# Supplementary material for: N-Terminal Amino Acid Affects the Translation Efficiency at Lower Temperatures in a Reconstituted Protein Synthesis System
Source: MDPI journal article supplement (doi:10.3390/ijms25105264), 2024-05-12
Supplement: s1 [file s1]

**Table S1. Sequence of DHFR and ALP derived from *E. coli* genome**

| Name | Amino acid sequence <sup>*1</sup>                                                                                                                                                                                                                                                                                                                                                                                                                                                                  | Nucleotide sequence <sup>*2, 3</sup>                                                                                                                                                                                                                                                                                                                                                                                                                                                                                                                                                                                                                                                                                                                                                                                                                                                                                                                                                                                                                                                                                                                                                                                                                                                                                                                                                                                                                                                                                                                                 |
|------|----------------------------------------------------------------------------------------------------------------------------------------------------------------------------------------------------------------------------------------------------------------------------------------------------------------------------------------------------------------------------------------------------------------------------------------------------------------------------------------------------|----------------------------------------------------------------------------------------------------------------------------------------------------------------------------------------------------------------------------------------------------------------------------------------------------------------------------------------------------------------------------------------------------------------------------------------------------------------------------------------------------------------------------------------------------------------------------------------------------------------------------------------------------------------------------------------------------------------------------------------------------------------------------------------------------------------------------------------------------------------------------------------------------------------------------------------------------------------------------------------------------------------------------------------------------------------------------------------------------------------------------------------------------------------------------------------------------------------------------------------------------------------------------------------------------------------------------------------------------------------------------------------------------------------------------------------------------------------------------------------------------------------------------------------------------------------------|
| DHFR | MISLIAALAVDRVIGMENAMPWNLPADLAWFKRNTLNKPVIMGRHTW<br>ESIGRPLPGRKNIILSSQPGTDDRVTWVKSVDIAAACGDVPEIMVI<br>GGGRVYEQFLPKAQKLYLTHIDAEVEGDTHFPDYEPDDWESVFSEFH<br>DADAQNSHSYCFEILERR                                                                                                                                                                                                                                                                                                                         | <u>gaaattaatac</u> <u>gactcactatagggagaccacaacggtttccctctagaaataattttgtttaactttaagaaggagata</u> <u>tacca</u><br>ATGATCAGTCTGATTGCGGCGTTAGCGGTAGATCGCGTTATCGGCATGGAACGCCATGCCGTGGAACCTGCCTGCCGATCTCG<br>CCTGGTTTAAACGCAACACCTTAAATAAACCCGTGATTATGGGCCGCCATACCTGGGAATCAATCGGTCGTCGTTGCCAGGACG<br>CAAAAATATTATCCTCAGCAGTCAACCGGGTACGGACGATCGCGTAACGTGGGTGAAGTCGGTGGATGAAGCCATCGCGGCGTGT<br>GGTGACGTACCAGAAATCATGGTGATTGGCGGCGGTGCGGTTTATGAACAGTTCTTGCCAAAAGCGCAAAACTGTATCTGACGC<br>ATATCGACGCAGAAGTGAAGGCGACACCCA <u>CTTTCCG</u> GATTACGAGCCGGATGACTGGGAATCGGTATTAGCGAATTCACGA<br>TGCTGATGCGCAGAACTCTCACAGCTATTGCTTTGAGATTCTGGAGCGGCGGtaatgaataactaatcc                                                                                                                                                                                                                                                                                                                                                                                                                                                                                                                                                                                                                                                                                                                                                                                                                                                                                                                 |
| ALP  | MRTPEMPVLENRAAQGDITAPGGARRLTGDQTAALRDSLSDKPAKNI<br>ILLIGDGMGDSEITAARNYAEGAGGFFKGIDALPLTGQYTHYALNKK<br>TGKPDYVTDASAATAWSTGVKTYNGALGVDIHEKDHPTILEMAKAA<br>GLATGNVSTAELQDATPAALVAHVTSRKCYGPSATSEKCPGNALEKG<br>GKGSITEQLLNARADVTLGGGAKTFAETATAGEWQKTLREQAARG<br>YQLVSDAASLNSVTEANQKPLLGLFADGNMPVRWLGPATYHGNID<br>KPAVTCPTNPQRNDSVPTLAQMTDKAIELLSKNEKGFFLQVEGASID<br>KQDHAANPCGQIGETVDLDEAVQRALEFAKKEGNTLVIVTADHAHAS<br>QIVAPDTKAPGLTQALNTKDGAVMVMSYGNSEEDSQEHTGSQRLIAA<br>YGPAAANVVGLTDQTDLFYTMKAALGLK | <u>gaaattaatac</u> <u>gactcactatagggagaccacaacggtttccctctagaaataattttgtttaactttaagaaggagata</u> <u>tacca</u><br>ATGCGGACACCAGAAATGCCTGTTCTGGAACCGGGCTGCTCAGGCGCATATTACTGCACCCGGCGGTGCTCGCCGTTAACGG<br>GTGATCAGACTGCCGCTCTGCGTGATTCTCTTAGCGATAAACCTGCAAAAAATATTATTTGCTGATTGGCGATGGGATGGGGGA<br>CTCGAAATTACTGCCGCACGTAATTATGCCGAAGGTGCGGCGGCTTTTTAAAGGTATAGATGCCTTACCGCTTACCGGGCAA<br>TACACTCACTATGCGCTGAATAAAAAAACCGCAAACCGACTACGTCACCGACTCGGCTGCATCAGCAACCGCTGGTCAACCG<br>GTGTCAAACTATAACGGCGCGCTGGGCGTCGATATTCAGAAAAAGATCACCAACGATTCTGGAAATGGCAAAAGCGCAGG<br>TCTGGCGACCGGTAACGTTTCTACCGCAGAGTTGCAGGATGCCACGCCGCTGCGCTGGTGGCACATGTGACCTCGCGCAATGC<br>TACGGTCCGAGCGCGACAGTGAAAAATGTCCGGGTAACGCTCTGAAAAAGGCGGAAAGGATCGATTACCGAACAGCTGCTTA<br>ACGCTCGTGCCGACGTTACGCTTGGCGGCGCGCAAAACCTTTGCTGAAACGGCAACCGCTGGTGAATGGCAGGGAAAAACGCT<br>GCGTGAACAGGCACAGGCGCGTGTTATCAGTTGGTGAGCGATGCTGCCTCACTGAATTCCGTGACGGAAGCGAATCAGCAAAAA<br>CCCCTGCTTGGCTGTTTGTGACGGCAATATGCCAGTGCGCTGGCTAGGACCGAAAGCAACGTACCATGGCAATATCGATAAGC<br>CCGCAGTACCTGTACGCCAAATCCGCAACGTAATGACAGTGTACCAACCCTGGCGCAGATGACCGACAAAGCCATTGAATTGTT<br>GAGTAAAAATGAGAAAGGCTTTTCTGCAAGTTGAAGGTGCGTCAATCGATAAACAGGATCATGCTGCGAATCCTTGTGGGCAA<br>ATTGGCGAGACGGTCGATCTCGATGAAGCCGTACAACGGGCGCTGGAATTCGCTAAAAAGGAGGGTAACACGCTGGTCATAGTCA<br>CCGCTGATCACGCCACGCCAGCAGATTGTTGCGCCGGATACCAAGCTCCGGGCCTCACCAGGCGCTAAATACCAAGATGG<br>CGCAGTGATGGTGATGAGTTACGGGAACCCGAAGAGGATTACAAGAACATACCGGCAGTCAGTTGCGTATTGCGGCGTATGGC<br>CCGCATGCCGCCAATGTTGTTGGACTGACCGACAGACCGATCTCTTACACCATGAAAGCCGCTCTGGGGCTGAAataatgaa<br>taactaatcc |

1. For ALP, only the mature region was used.

2. ORFs are shown by uppercase. T7 promoter and SD sequence are underlined and double-lined, respectively.

3 For DHFR, a slippery sequence (TTTCCCG) at position 372 was substituted with CTTTCCG indicated by red letters..

**Table S2. Sequence of sfGFP and Luc**

| Name  | Amino acid sequence                                                                                                                                                                                                                                                                                                                                                                                                                                                                                                                                                                                         | Nucleotide sequence <sup>*1</sup>                                                                                                                                                                                                                                                                                                                                                                                                                                                                                                                                                                                                                                                                                                                                                                                                                                                                                                                                                                                                                                                                                                                                                                                                                                                                                                                                                                                                                                                                                                                                                                                                                                                                                                                                                                                                                                                                                         |
|-------|-------------------------------------------------------------------------------------------------------------------------------------------------------------------------------------------------------------------------------------------------------------------------------------------------------------------------------------------------------------------------------------------------------------------------------------------------------------------------------------------------------------------------------------------------------------------------------------------------------------|---------------------------------------------------------------------------------------------------------------------------------------------------------------------------------------------------------------------------------------------------------------------------------------------------------------------------------------------------------------------------------------------------------------------------------------------------------------------------------------------------------------------------------------------------------------------------------------------------------------------------------------------------------------------------------------------------------------------------------------------------------------------------------------------------------------------------------------------------------------------------------------------------------------------------------------------------------------------------------------------------------------------------------------------------------------------------------------------------------------------------------------------------------------------------------------------------------------------------------------------------------------------------------------------------------------------------------------------------------------------------------------------------------------------------------------------------------------------------------------------------------------------------------------------------------------------------------------------------------------------------------------------------------------------------------------------------------------------------------------------------------------------------------------------------------------------------------------------------------------------------------------------------------------------------|
| sfGFP | MSKGEELFTGVVPILVELDGDVNGHKFSVRGEGEGDATNGKLTCLKFI<br>CTTGKLPVPWPTLVTTLTYGVCFSRYPDHMKRHDFFKSAMPEGYVQ<br>ERTISFKDDGTYKTRAEVKFEGDTLVNRIELKGIDFKEDGNILGHKL<br>EYNFNSHNVYITADKQKNGIKANFKIRHNVEDGSVQLADHYQQNTPI<br>GDGPVLLPDNHYLSTQSVLSKDPNEKRDMVLLEFVTAAGITHGMD<br>LYK                                                                                                                                                                                                                                                                                                                                            | <u>gaaattaatac</u> <u>gactcactatagggagaccacaacggtttccctctagaaataat</u> <u>tttg</u> <u>ttaactttaagaaggagata</u> <u>tacca</u><br>ATGTCTAAAGGTGAAGAATTATTTACTGGTGTGTGCCGATCCTGGTCGAACGGACGGTGATGTGAATGGGCATAAATTCCTGG<br>TTCGGGGCGAAGGAGAGGGTGACGCAACTAACGGCAAACCTACCTCAAGTTTATTTGTACCACAGGTAACTGCCAGTCCCGTG<br>GCCCACGCTGGTGACCACTTTGACCTACGGCGTACAGTGCTTCAGCCGCTATCCGGATCACATGAAACGTCATGATttcTTCAA<br>TCAGCGATGCCTGAAGGGTATGTTCAGGAACGCACGATTAGCTTTAAAGACGATGGCACCTACAAGACACGTGCCGAGGTGAAAT<br>TTGAAGGTGATACGTTAGTCAATCGCATCGAACTGAAAGGCATTGACTTCAAAGAGGATGGAACATCCTGGGTCATAAGCTGGA<br>ATATAACTTTAATTCACAACTGTACATTACCGCTGACAAACAaagAATGGCATCAAAGCGAACTTCAAGATTCGTCATAAT<br>GTTGAAGATGGGTCCGTACAGCTTGACAGTACTATCAGCAAACTCCGATCGGTGACGGCCAGTGCTCCTGCCGGATAATC<br>ATTACTTGAGTACCCAGTCGGTCTTAAGCAAAGATCCGAACGAGAAACGCGACCATGTTCTGCTGGAATTTGTGACGGCCG<br>GGGTATTACCCATGGCATGGATGAACTGTATAAAtaatgaataactaatcc                                                                                                                                                                                                                                                                                                                                                                                                                                                                                                                                                                                                                                                                                                                                                                                                                                                                                                                                                                                                                   |
| Luc   | MEDAKNIKKGPAPFYPLEDGTAGEQLHKAMKRYALVPGTIAFTDAHI<br>EVNITYAEYFEMSVRLAEAMKRYGLNTNHRIVVCSENSLQFFMPVLG<br>ALFIGVAVAPANDIYNERELLNSMNI SQPTVVFSKKGLQKILNVQK<br>KLPIIQKIIIMDSKTDYQGFQSMYTFVTSHLPPGFNEYDFVPESFDR<br>DKTIALIMNSSGSTGLPKGVALPHRTACVRFSHARDPIFGNQIIPDT<br>AILSVPFHHGFGMFTTLGYLICGFRVVLMYRFEELFLRSLQDYKI<br>QSALLVPTLFSFFAKSTLIDKYDLSNLHEIASGGAPLSKEVGEAVAK<br>RFHLPGIRQGYGLTETTSAILITPEGDDKPGAVGVVPPFEAKVVDL<br>DTGKTLGVNQRGELCVRGPMIMSGYVNNPEATNALIDKDWLHSGDI<br>AYWDEDEHFFIVDRLKSLIKYKGYQVAPAELESILLQHPNIFDAGVA<br>GLPDDDAGELPAVVVLEHGKTMTEKEIVDYVASQVTTAKKLRGVV<br>FVDEVPKGLTGKLDARKIREILIKAKKGKSKL | <u>gaaatt</u> <u>aatac</u> <u>gactcactatagggagaccacaacggtttccctctagaaataat</u> <u>tttg</u> <u>ttaactttaagaaggagata</u> <u>tacca</u><br>ATGGAAGATGCTAAAAATATTA AAAAAGGTCCAGCGCCTTTTATCCTCTGGAGGACGGTACTGCTGGGGAACAGCTTCACAAAG<br>CAATGAAACGTTACGCCCTGGTGCCGGGCACCATCGCGTTCCTGATGCTCACATTGAAGTCAACATCACGTACGCAGAAATTTT<br>CGAGATGTCTGTACGCTGGCTGAAGCGATGAAAAGGTACGGTCTCAACACCAACCATCGAATTGTTGTGTGTAGCGAAAATTC<br>CTGCAGTTTTTCTGCGGTTCTGGGCGCCTGTTTATCGGTGTAGCTGTTGCACCGGCGAACGACATCTACAACGAACGTGAGT<br>TACTTAACAGTATGAATATTTACAGCCAACAGTCGTGTTCTGTTCTAAGAAAGGACTGCAAAAAATCCTGAACGTACAGAAAA<br>GCTGCCGATCATTAGAAAATCATCATAATGGATAGCAAACTGACTATCAAGGCTTCCAGTCCATGTACACCTTTGTTACTTCG<br>CACTTGCTCCGGGCTTCAACGAATATGATTTCTGCGCGAATCTTTGACCGTGATAAAACGATTGCTCTCATCATGAACAGCT<br>CTGGTTCCACCGGCTGCCAAGGGGGTAGCACTGCCACATCGCACTGCTTGCGTTCTGTTTCTAGTACGCGCCGACCCGATTTT<br>CGGTAATCAGATCATCCCTGATACCGCGATTCTGAGCGTCTGTTCCGTTTACCATGGCTTCGGTATGTTCTACTACGCTTGCTAC<br>CTGATCTGTGGTTTTCTGTGTAGTGTTAATGTACCGGTTGAGGAAGAAGTCTTTCTGAGATCTCTGCAGGACTATAAAATCCAAT<br>CCGCTCTCCTGTTCCGACCTTGTCTCATTCTTTGCAAAATCTACTCTGATTGATAAATACGACCTTAGCAACCTGCACGAAAT<br>CGCTTCGGGCGGTGCGCCGCTGTCTAAGGAGGTAGGGGAAGCAGTTGCCAAACGTTTCCATTTACCAGGAATCCGCCAGGGTTAC<br>GGCCTGACCGAAACAACCTCCGCTATTCTGATCACGCCTGAGGGTGACGATAAACCGGGCGCGGTGGGTAAGGTGTTCCCTTCT<br>TTGAAGCTAAAGTAGTGGACCTCGATACCGGCAAACTCTGGGTGTTAACCAGCGTGGGGAACCTTTCGCTACGCGGCCGATGAT<br>TATGAGTGGTTATGTTAACAATCCGGAAGCAACCAACGCTCTGATCGACAAAGATGGCTGGCTGCACAGCGGTGACATCGCTAC<br>TGGGATGAGGACGAACACTTCTTCATTGTGATCGTCTGAAGTCTTTGATCAAATACAAAGGATATCAAGTGGCGCCAGCAGAAC<br>TGGAGTCCATCTTACTGCAGCATCTAACATTTTTGACGCTGGTGTGCGGGCCTCCCGGATGACGATGCTGGTGAATGCCGGC<br>AGCCGTAGTTGTGCTTGAACACGGGAAAATATGACGGAAGGAGATCGTAGACTACGTTGCTAGCCAGGTACCACTGCGAAA<br>AAACTGCGTGGCGGTGTTGTGTTCTGTAGATGAAGTTCCGAAAGGCTGACCGGTAAGCTGGACGCACGCAAAATCCGTGAAATTC<br>TGATCAAAGCTAAAAAGGCGGTAAATCTAAACTGtaatgaataactaatcc |

1. ORFs are shown by uppercase. T7 promoter and SD sequence are underlined and double-lined, respectively.

**Table S3. Sequence of trastuzumab HC (AT variant)**

| Name | Amino acid sequence                                                                                                                                                                                                                            | Nucleotide sequence <sup>*1</sup>                                                                                                                                                                                                                                                                                                                                                                                                                                                                                                                                                                                                                                                                                                                                                                                                                                                |
|------|------------------------------------------------------------------------------------------------------------------------------------------------------------------------------------------------------------------------------------------------|----------------------------------------------------------------------------------------------------------------------------------------------------------------------------------------------------------------------------------------------------------------------------------------------------------------------------------------------------------------------------------------------------------------------------------------------------------------------------------------------------------------------------------------------------------------------------------------------------------------------------------------------------------------------------------------------------------------------------------------------------------------------------------------------------------------------------------------------------------------------------------|
| AT   | MEVQLVESGGGLVQPGGSLRLSCAASGFNIKDTYIHWVRQAPGKGLE<br>WVARIYPTNGYTRYADSVKGRFTISADTSKNTAYLQMNSLRAEDTAV<br>YYCSRWGGDGFYAMDYWGQGLVTVSSASTKGPSVFPLAPSSKSTSG<br>GTAALGCLVKDYFPEPVTVSWNSGALTSGVHTFPAVLQSSGLYSLSS<br>VVTVPSSSLGTQTYICNVNHKPSNTKVDKKVEPKS | <u>gaaattaatac</u> <u>gactcactatagggagaccacaac</u> <u>ggtttccctctagaaataat</u> <u>tttg</u> <u>tttaactttaagaaggagata</u> <u>tacca</u><br>ATGGAAGTACAATTAGTTGAATCGGGTGGTGGTCTGGTCCAACCGGGTGGCTCGCTGCGTCTGTCTGTGCGGCGTCGGGCTTTA<br>ACATCAAAGATACCTATATTCATTGGGTTCGTCAGGCACCGGGCAAAGTCTGGAATGGGTCGCTCGCATCTACCCGACCAACGG<br>CTATACGCGTTACGCGGATTCTGTGAAAGGTCGCTTTACCATTTCCGCGGACACCTCAAAAAACACGGCCTATCTGCAGATGAAC<br>AGCCTGCGTGCAGAAGACACGGCTGTTTATTACTGCAGTCGCTGGGGCGGTGATGGCTTTTATGCCATGGACTACTGGGGCCAAG<br>GTACCCTGGTCACCGTGAGCTCTGCATCGACCAAAGGTCCGAGCGTCTTCCCGTGGCTCCGAGTTCCAAATCGACCAGCGGCGG<br>TACGGCAGCACTGGGTTGTCTGGTTAAAGATTATTTCCGGAACCGGTTACCGTCTCTTGGAACAGTGGCGCGCTGACCAGCGGT<br>GTCCATACGTTCCCGCAGTGCTGCAGTCATCGGTCTGTATAGCCTGAGCTCTGTGGTTACCGTGCCGAGTTCCTCACTGGGTA<br>CCCAAACGTACATCTGCAACGTTAATCACAAACCGTCCAATACGAAAGTGGATAAAAAAGTTGAACCGAAAAGTtaatgaataac<br>taatcc |

1. ORF is shown by uppercase. T7 promoter and SD sequence are underlined and double-lined, respectively.
